# Supplementary material for: LRIG1 is a conserved EGFR regulator involved in melanoma development, survival and treatment resistance
Source: PubMed Central journal article supplement (PMC8154585; doi:10.1038/s41388-021-01808-3), 2021-05-04

# SUPPLEMENTARY FIGURE 1

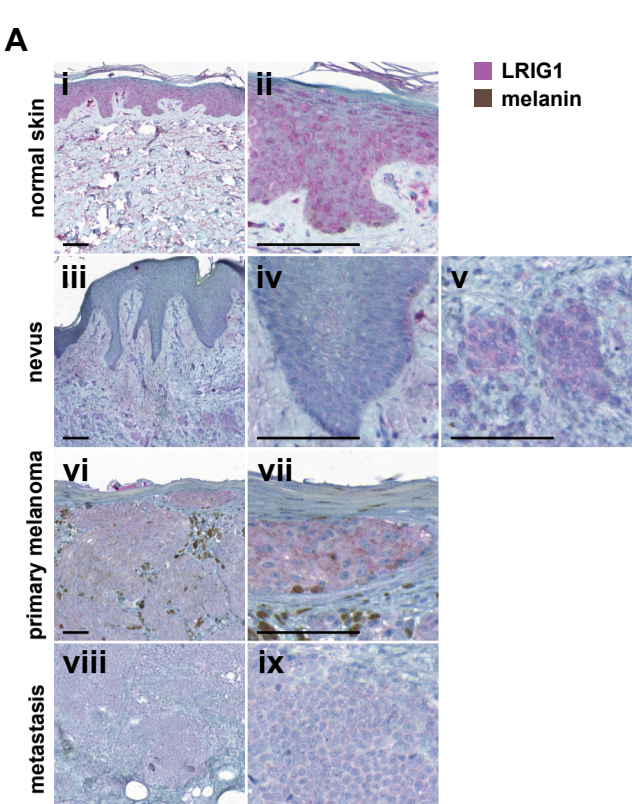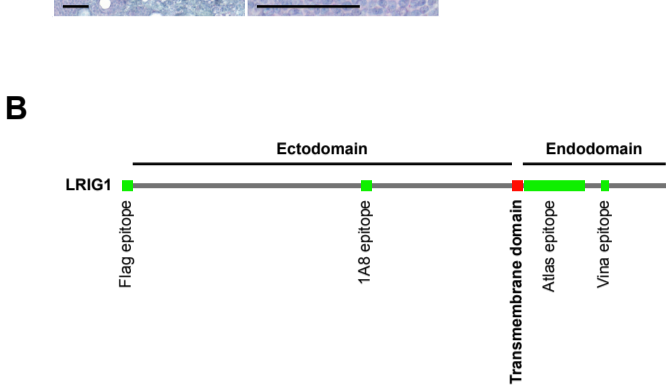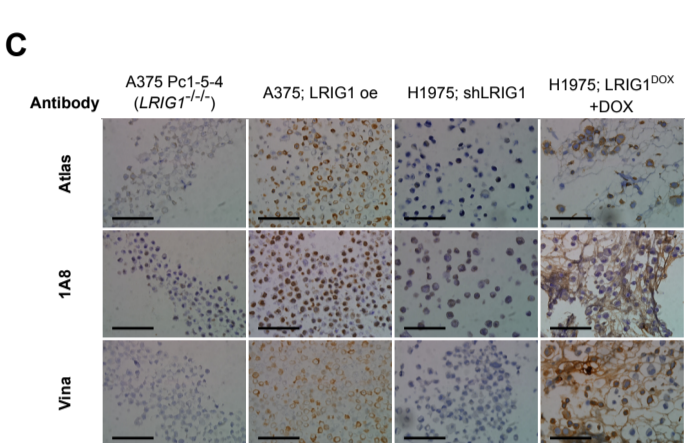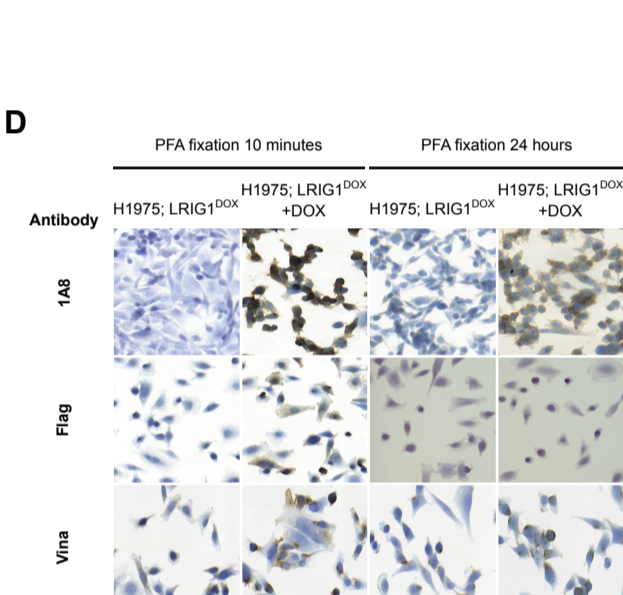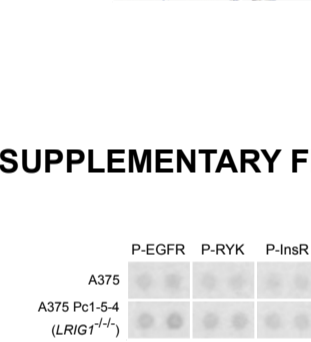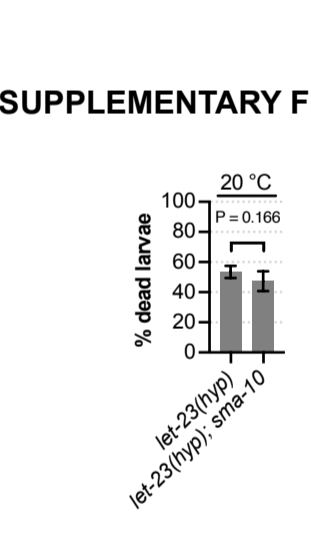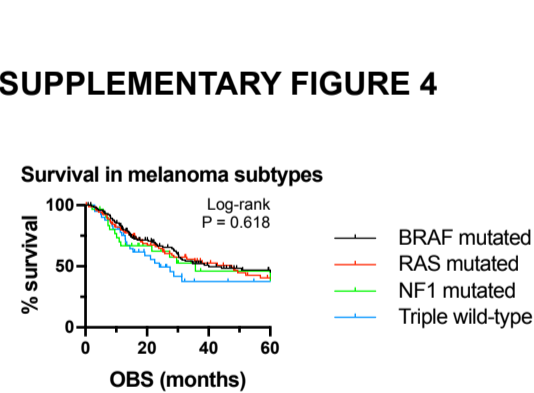

# SUPPLEMENTARY FIGURE 5

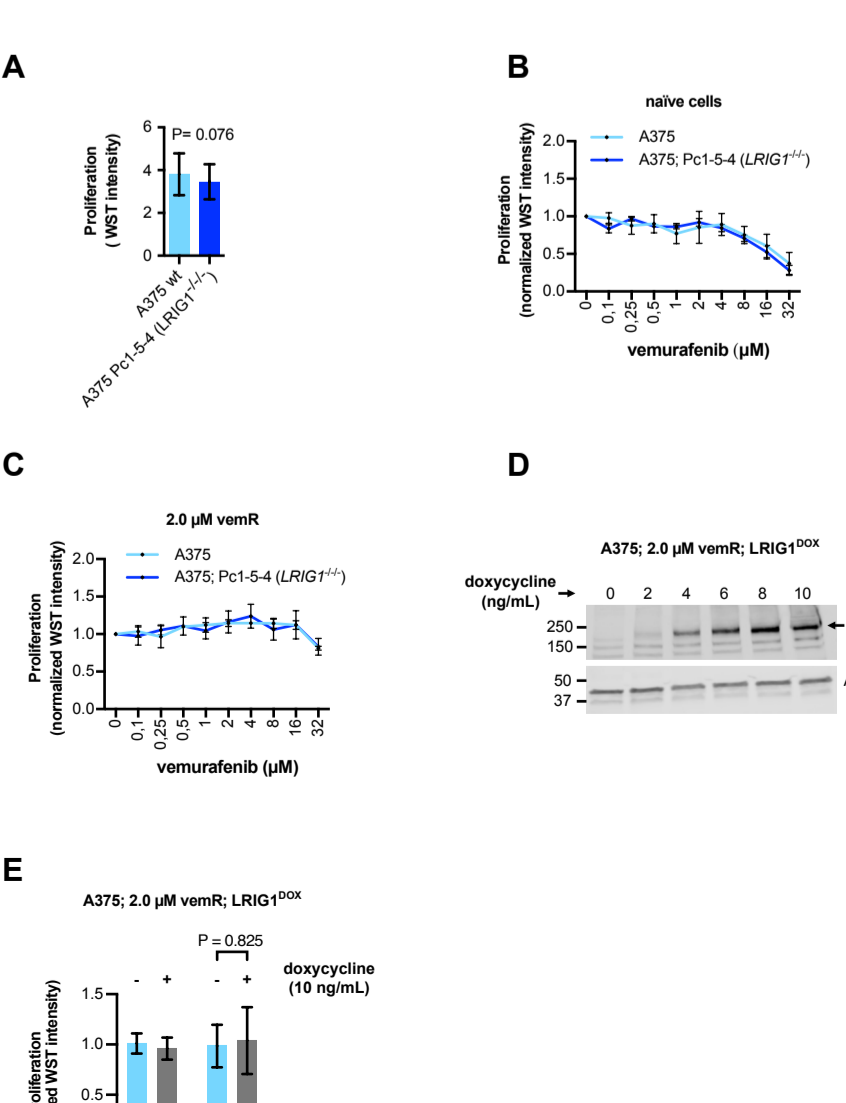

Supplement: 41388_2021_1808_MOESM1_ESM.pdf [file 41388_2021_1808_MOESM1_ESM.pdf]
